# Supplementary material for: Molecular Mechanisms Generating and Stabilizing Terminal 22q13 Deletions in 44 Subjects with Phelan/McDermid Syndrome
Source: PLoS Genet. 2011 Jul 14;7(7):e1002173. doi: 10.1371/journal.pgen.1002173 (PMC3136441; doi:10.1371/journal.pgen.1002173)
Supplement: Figure S5 — Molecular characterisation of the ring 22-associated deletion in subject P26. A, Whole chromosome view (left) and detail (right) of array-CGH analysis using a 180k Agilent kit microarray. B, Inverse-PCR amplification and direct sequencing of the amplified fragments revealed the breakpoint junction. Repetitive sequences are shown in lowercase letters. C, FISH analysis using the PAN-Tel probe confirmed the deletion of the 22p and 22q telomeres of ring chromosome 22 (arrow). (PDF) [file pgen.1002173.s005.pdf]

# Subject P26

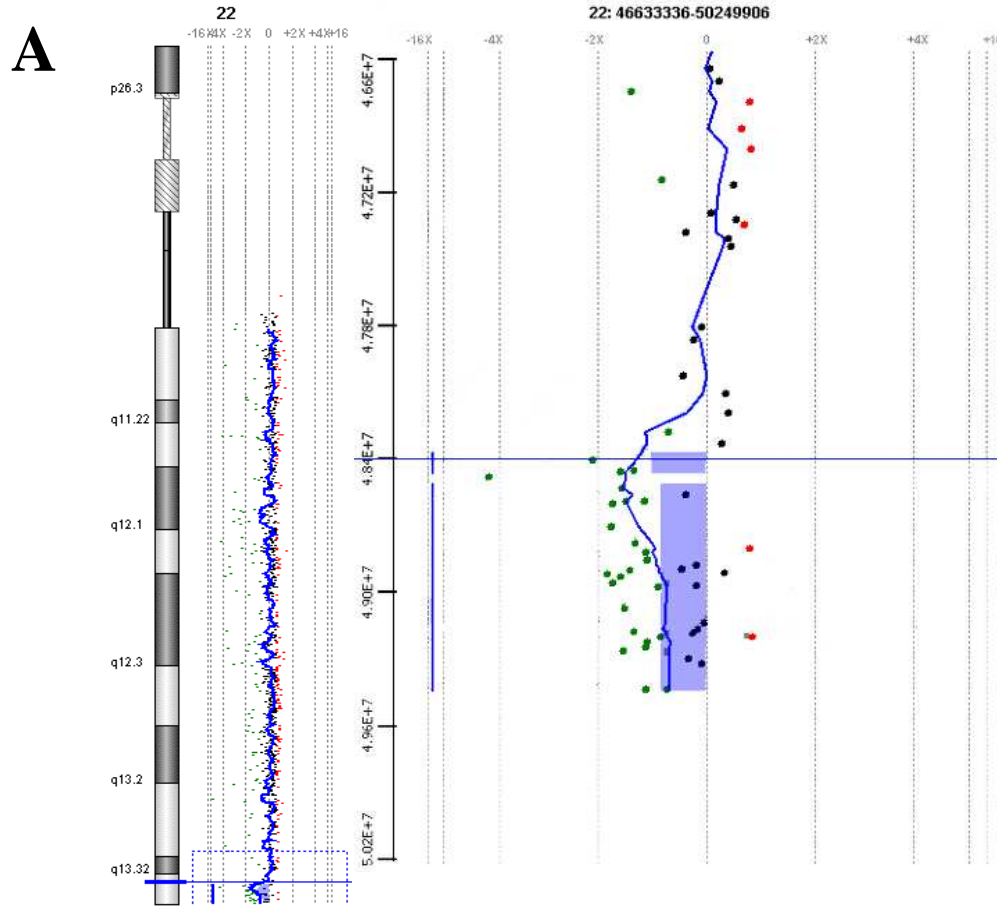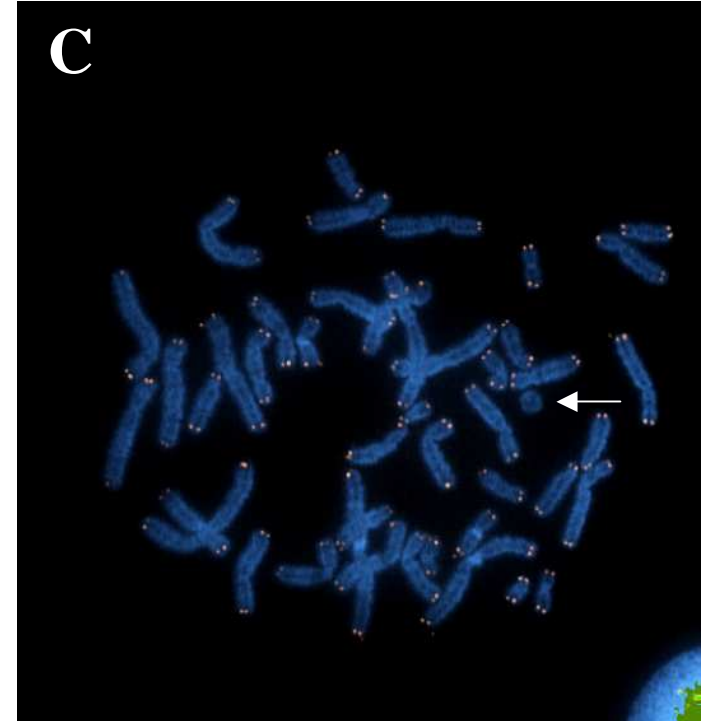

| <b>B</b>                  | <b>Chromosome</b>          | <b>Position (hg18)</b>                                            | <b>Sequence</b>                                                    |
|---------------------------|----------------------------|-------------------------------------------------------------------|--------------------------------------------------------------------|
| <i><b>BP Chr. 22q</b></i> | chr22:48448979-48449038    | agagtgagcagcagcaagatttagcgcaa<br>IIIIIIIIIIIIIIIIIIIIIIIIIIIIIIII | gagcaaaagaacaaagcttccacactgctg                                     |
| <i><b>Junction</b></i>    |                            | agagtgagcagcagcaagatttagcgcaa                                     | ttcaatggaattcaatggaatgcaatggaa<br>IIIIIIIIIIIIIIIIIIIIIIIIIIIIIIII |
| <i><b>BP Chr. 22p</b></i> | Many telomeres/centromeres |                                                                   | ttcaatggaattcaatggaatgcaatggaa                                     |
