# Supplementary material for: Molecular Mechanisms Generating and Stabilizing Terminal 22q13 Deletions in 44 Subjects with Phelan/McDermid Syndrome
Source: PubMed Central journal article supplement (PMC3136441; doi:10.1371/journal.pgen.1002173), 2011-07-14
Supplement: pgen.1002173.s002.pdf [file pgen.1002173.s002.pdf]

## Terminal deletions

| P01                    | Position                | Sequence                                                           | Repeats                                                             |                      |
|------------------------|-------------------------|--------------------------------------------------------------------|---------------------------------------------------------------------|----------------------|
| BP Chr. 22<br>Junction | chr22:48609895-48609954 | ggccgagggcgccagactacctgaggtcgg<br>ggccgagggcgccagactacctgaggtcgg   | gagttcaagaccagcctgatcaacatggag<br>TTAG (GGTTAG)n                    | AluSp                |
| P02                    | Position                | Sequence                                                           | Repeats                                                             |                      |
| BP Chr. 22<br>Junction | chr22:44280750-44280809 | GGGAAGAGCGCAATTCTGCCAATACCCAG<br>GGGAAGAGCGCAATTCTGCCAATACCCAG     | AATTGTTTTCCCAAGATGCCTCTGCACAT<br>GGAGAG (GGTGA)n                    | None                 |
| P03                    | Position                | Sequence                                                           | Repeats                                                             |                      |
| BP Chr. 22<br>Junction | chr22:47183281-47183340 | tgtaatcccagcactttgggaggccaaggt<br>tgtaatcccagcactttgggaggccaaggt   | gggtggataattggaggtcaggagtttgag<br>TAG (GGTTAG)n                     | AluSx                |
| P04                    | Position                | Sequence                                                           | Repeats                                                             |                      |
| BP Chr. 22<br>Junction | chr22:48040155-48040214 | GGCTGGCTCAGGCCGGGACTCTGGGTCAGG<br>GGCTGGCTCAGGCCGGGACTCTGGGTCAGG   | TGCAGCCTCATGAAAGACCTCTACAGGAG<br>GTTAG (GGTTAG)n                    | None                 |
| P05                    | Position                | Sequence                                                           | Repeats                                                             |                      |
| BP Chr. 22<br>Junction | chr22:43136766-43136825 | gttacagccaggggtagttatagccaggg<br>gttacagccaggggtagttatagccaggg     | gtagttacagccaggggtagttatagcc<br>TTAG (GGTTAG)n                      | Simple tandem repeat |
| P06                    | Position                | Sequence                                                           | Repeats                                                             |                      |
| BP Chr. 22<br>Junction | chr22:47040707-47040766 | GGTAACCCAGCTGAGGTCCACAGATCACGG<br>GGTAACCCAGCTGAGGTCCACAGATCACGG   | ACAGGCATGCTGGGAGTGGCCACAGGGAGA<br>TTAG (GGTTAG)n                    | None                 |
| P07                    | Position                | Sequence                                                           | Repeats                                                             |                      |
| BP Chr. 22<br>Junction | chr22:46600236-46600295 | AGGATGTTTTACAATACCAAGGGTGGAAAT<br>AGGATGTTTTACAATACCAAGGGTGGAAAT   | CCAACCCAACTCCCCTTTGTAAAACAAAG<br>ATCTTTGTGAGAACAGACAA TAG (GGTTAG)n | None                 |
| P08                    | Position                | Sequence                                                           | Repeats                                                             |                      |
| BP Chr. 22<br>Junction | chr22:41517849-41517908 | CTGGGCCTCAGGAActCTGCTGCTGCTGTT<br>CTGGGCCTCAGGAActCTGCTGCTGCTGTT   | GGGGCTGCCCCAAGCTAGCGTGGACAGAAG<br>TAACCCTAACTGCT (GGTTAG)n          | None                 |
| P12                    | Position                | Sequence                                                           | Repeats                                                             |                      |
| BP Chr. 22<br>Junction | chr22:44623743-44623802 | aatggagagagagacttgagttggaactgt<br>aatggagagagagacttgagttggaactgt   | gtgtctgagggaggatccgtaggacaagct<br>TAG (GGTTAG)n                     | L2                   |
| P13                    | Position                | Sequence                                                           | Repeats                                                             |                      |
| BP Chr. 22<br>Junction | chr22:48476926-48476985 | actctagagtgaaggtaaagggcagttttag<br>actctagagtgaaggtaaagggcagttttag | accaagatcaaaagtttactatcagtgaaa<br>(GGTTAG)n                         | LIMEd                |

|                            | <b>P14</b>              | <b>Position</b>                                                    | <b>Sequence</b>                                            | <b>Repeats</b>                      |
|----------------------------|-------------------------|--------------------------------------------------------------------|------------------------------------------------------------|-------------------------------------|
| <b>BP Chr. 22 Junction</b> | chr22:43867958-43868017 | aggtctggaaagtccttaggcatgtgcagt<br>aggtctggaaagtccttaggcatgtgcagt   | cacctctcatgctacctcgtgtgcacat<br><b>TAG (GGTTAG)n</b>       | LTR45C                              |
| <b>P20 BP1</b>             | <b>Position</b>         | <b>Sequence</b>                                                    | <b>Repeats</b>                                             |                                     |
| <b>BP Chr. 22 Junction</b> | chr22:42406130-42406189 | AAAATCTGAAAAGAATATAAGGTTCTCTTG<br>AAAATCTGAAAAGAATATAAGGTTCTCTTG   | AGGGGTAAATTAAGTACTTTAGGGGATATA<br><b>GTTAG (GGTTAG)n</b>   | None                                |
| <b>P20 BP2</b>             | <b>Position</b>         | <b>Sequence</b>                                                    | <b>Repeats</b>                                             |                                     |
| <b>BP Chr. 22 Junction</b> | chr22:42603398-42603457 | ACTCCTGCCAAGAcaggtctaggtcaagat<br>ACTCCTGCCAAGAcaggtctaggtcaagat   | taattgcattagaatctctcagaagagcc<br><b>GGTTAG (GGTTAG)n</b>   | MER5b                               |
| <b>P20 BP3</b>             | <b>Position</b>         | <b>Sequence</b>                                                    | <b>Repeats</b>                                             |                                     |
| <b>BP Chr. 22 Junction</b> | chr22:42728708-42728767 | aagcttattttataagaaagtattgaagat<br>aagcttattttataagaaagtattgaagat   | cttgtgcagtttgttgaataccgtacATGA<br>AT <b>TTAG (GGTTAG)n</b> | Tigger5                             |
| <b>P21</b>                 | <b>Position</b>         | <b>Sequence</b>                                                    | <b>Repeats</b>                                             |                                     |
| <b>BP Chr. 22 Junction</b> | chr22:44960699-44960758 | ACTTAGATACCACAGGATTGGCAGTGTAGA<br>ACTTAGATACCACAGGATTGGCAGTGTAGA   | CTTACATTCATAGACCGGATGCCATCAGCC<br><b>TTAG (GGTTAG)n</b>    | None                                |
| <b>P30</b>                 | <b>Position</b>         | <b>Sequence</b>                                                    | <b>Repeats</b>                                             |                                     |
| <b>BP Chr. 22 Junction</b> | chr22:46018962-46019021 | cttactattatgattttgttgtttatattgg<br>cttactattatgattttgttgtttatattgg | tgttttcttgctgtcatggtgaagtaatga<br><b>TAG (GGTTAG)n</b>     | LIMCc                               |
| <b>P31</b>                 | <b>Position</b>         | <b>Sequence</b>                                                    | <b>Repeats</b>                                             |                                     |
| <b>BP Chr. 22 Junction</b> | chr22:49469041-49469100 | Agagggggtggagaggggggtggtggaggg<br>Agagggggtggagaggggggtggtggaggg   | gggtggtggagaggggggtggtggaggggg<br><b>TTAG (GGTTAG)n</b>    | G-rich, Low complexity (SHANK3-REP) |
| <b>P32</b>                 | <b>Position</b>         | <b>Sequence</b>                                                    | <b>Repeats</b>                                             |                                     |
| <b>BP Chr. 22 Junction</b> | chr22:49469045-49469104 | ggggtggagaggggggtggtggagggggtt<br>ggggtggagaggggggtggtggagggggtt   | gggtggagaggggggtggtggagggggatgg<br><b>AG (GGTTAG)n</b>     | G-rich, Low complexity (SHANK3-REP) |
| <b>P34</b>                 | <b>Position</b>         | <b>Sequence</b>                                                    | <b>Repeats</b>                                             |                                     |
| <b>BP Chr. 22 Junction</b> | chr22:45252070-45252129 | attggctttttttttttttttgagacggagt<br>attggctttttttttttttttgagacggagt | cttgctctgtcaccaggctggagtgcagtg<br><b>TAG (GGTTAG)n</b>     | AluSc                               |
| <b>P36</b>                 | <b>Position</b>         | <b>Sequence</b>                                                    | <b>Repeats</b>                                             |                                     |
| <b>BP Chr. 22 Junction</b> | chr22:40440085-40440144 | caaccctttgaacaaatgagagattgaagt<br>caaccctttgaacaaatgagagattgaagt   | ccagggaggaaaaggagctttcctgaggtc<br><b>TAG (GGTTAG)n</b>     | MIR3                                |

| P39                    | Position                | Sequence                                                       | Repeats                                                                                                  |      |
|------------------------|-------------------------|----------------------------------------------------------------|----------------------------------------------------------------------------------------------------------|------|
| BP Chr. 22<br>Junction | chr22:49468904-49468963 | GTCCCCTCGCCAGGGAGAGAGAGGGTCAG<br>GTCCCCTCGCCAGGGAGAGAGAGGGTCAG | CAGGGCTCTGGGCAGGGTATGGGAAAA<br>(GGTCAG) <sub>6</sub> (GGTTAG)(GGTCAG) <sub>2</sub> (GGTTAG) <sub>n</sub> | None |

| P40                    | Position                | Sequence                                                           | Repeats                                                                               |        |
|------------------------|-------------------------|--------------------------------------------------------------------|---------------------------------------------------------------------------------------|--------|
| BP Chr. 22<br>Junction | chr22:42119850-42119912 | gcaaggtgatcagggtagggcttcttggagg<br>gcaaggtgatcagggtagggcttcttggagg | <b>agg</b> tgatatctgaggtgagatctggaaagcaag<br><b>agg</b> ggttgtctcaggtcctagtgtgtctggaa | L2     |
| BP Chr. X/Y            | chrX/Y:418-480 (rev.)   | ggaactgggtaTCAACCAGGTGCTCTTCT                                      | <b>AGG</b> ggttgtctcaggtcctagtgtgtctggaa                                              | LTR12d |

## Interstitial deletions

| P37         |  | Position (hg18)               | Sequence                                                                                           |                                                              | Repeats  |
|-------------|--|-------------------------------|----------------------------------------------------------------------------------------------------|--------------------------------------------------------------|----------|
| BP1 Chr. 22 |  | chr22:49417717-49417776       | cacataataatggttgctaggccttagaa                                                                      | atcctcttcacaaaattaaagagcaaaaat                               | LTR49int |
| Junction    |  |                               | cacataataatggttgctaggccttagaa                                                                      | GCTGCAACCC CAGGTGGTACGGGAGGGCAGGCGGTCCAGC                    |          |
| BP2 Chr. 22 |  | chr22:49491490-49491549       | TCCATGATGGGCAGACAGGGCCGGGAGACA                                                                     | CAGGTGGTACGGGAGGGCAGGCGGTCCAGC                               | None     |
| P38         |  | Position (hg18)               | Sequence                                                                                           |                                                              | Repeats  |
| BP1 Chr. 22 |  | chr22:49493608-49493667       | cctcggcctcccaaagtgctgggattacag                                                                     | <b>gcgt</b> gagcactgcgcccagccAGAAGGATACAG                    | AluSg    |
| Junction    |  |                               | cctcggcctcccaaagtgctgggattacag                                                                     | <b>gcgt</b> atggtgaaccagccttgcacccagggatg                    |          |
| BP2 Chr. 22 |  | chr22:49537718-49537781       | gtttatatactggattacatttatcagttt                                                                     | <b>gcgt</b> atggtgaaccagccttgcacccagggatg                    | LIPA4    |
| P42         |  | Position (hg18)               | Sequence                                                                                           |                                                              | Repeats  |
| BP1 Chr. 22 |  | chr22:49511283-49511342       | TCCGGTAACCTGTGGAAAAATGATGAGCTCT <b>GGGG</b> CCACCTTTGATTTTCAGGGGAACCTG                             |                                                              | None     |
| Junction    |  |                               | TCCGGTAACCTGTGGAAAAATGATGAGCTCT <b>GGGG</b> ACGGGCGGAGGGGAGCGGGCAGGGTCTCTACTGTGACCTGGGTGGGCGGTGCTC |                                                              |          |
| BP2 Chr. 22 |  | chr22:49515909-49515996 (rev) | CAGCGCCAGGTGAGGGGCGCACAGCCAAG <b>GGGG</b> ACGGGCGGAGGGGAGCGGGCAGGGTCCAGGAGGAAACGGGCTGGGGCTGCGGCT   |                                                              | None     |
| BP3 Chr. 22 |  | chr22:49528909-49528968       |                                                                                                    | GTCCTGAGGCCAGGCTGCAGCCCCACCACCTCTCTACTGTGACCTGGGTGGGCGGTGCTC | None     |
| P43         |  | Position (hg18)               | Sequence                                                                                           |                                                              | Repeats  |
| BP1 Chr. 22 |  | chr22:49498120-49498182       | GGCTGGTTGATCATCCCGCAGGCTGGGGCC                                                                     | <b>CTG</b> TTGATCAAACAGCTGCAAACCCAGCTGTGT                    | None     |
| Junction    |  |                               | GGCTGGTTGATCATCCCGCAGGCTGGGGCC                                                                     | <b>CTG</b> CAAGAGAGATATGTGGAGAAAATCATCATT                    |          |
| BP2 Chr. 22 |  | chr22:49525034-49525096       | TATGGGAACAATAAACAGTAAAGGCGCCT                                                                      | <b>CTG</b> CAAGAGAGATATGTGGAGAAAATCATCATT                    | None     |
| P44         |  | Position (hg18)               | Sequence                                                                                           |                                                              | Repeats  |
| BP1 Chr. 22 |  | chr22:49433639-49433698       | ttcaggcaattctcctgcctcagcctccca                                                                     | agtagctgggattacagcatgcaccacca                                | AluSx    |
| Junction    |  |                               | ttcaggcaattctcctgcctcagcctccca                                                                     | GAAGTGTGTGTTGAGGAAGTAACTGGGCCA                               |          |
| BP2 Chr. 22 |  | chr22:49472587-49472646       | TGCCACAGCTGCTCTCAAGGCCACTGCAGG                                                                     | GAAGTGTGTGTTGAGGAAGTAACTGGGCCA                               | None     |
