# Supplementary material for: Molecular Mechanisms Generating and Stabilizing Terminal 22q13 Deletions in 44 Subjects with Phelan/McDermid Syndrome
Source: PubMed Central journal article supplement (PMC3136441; doi:10.1371/journal.pgen.1002173), 2011-07-14
Supplement: pgen.1002173.s004.pdf [file pgen.1002173.s004.pdf]

# Subject P28

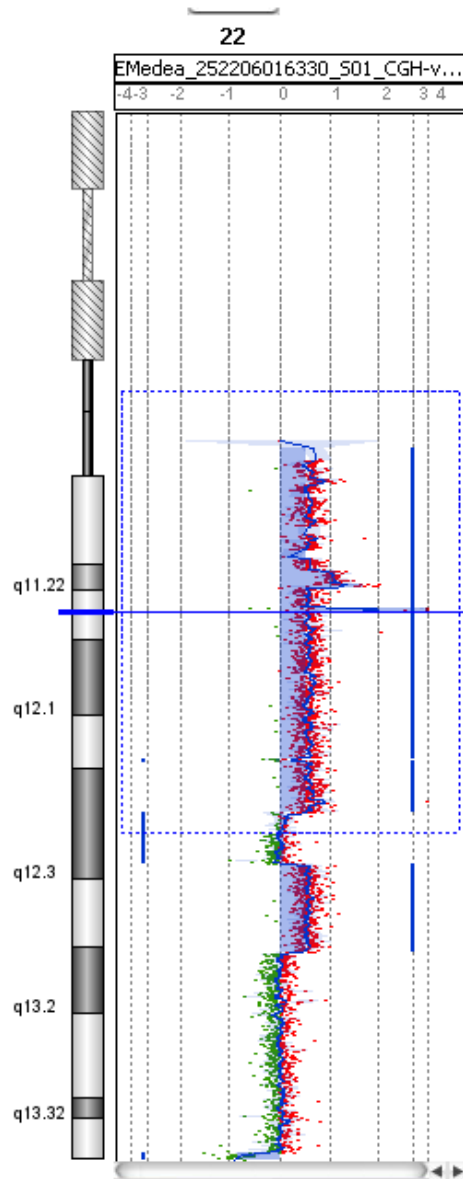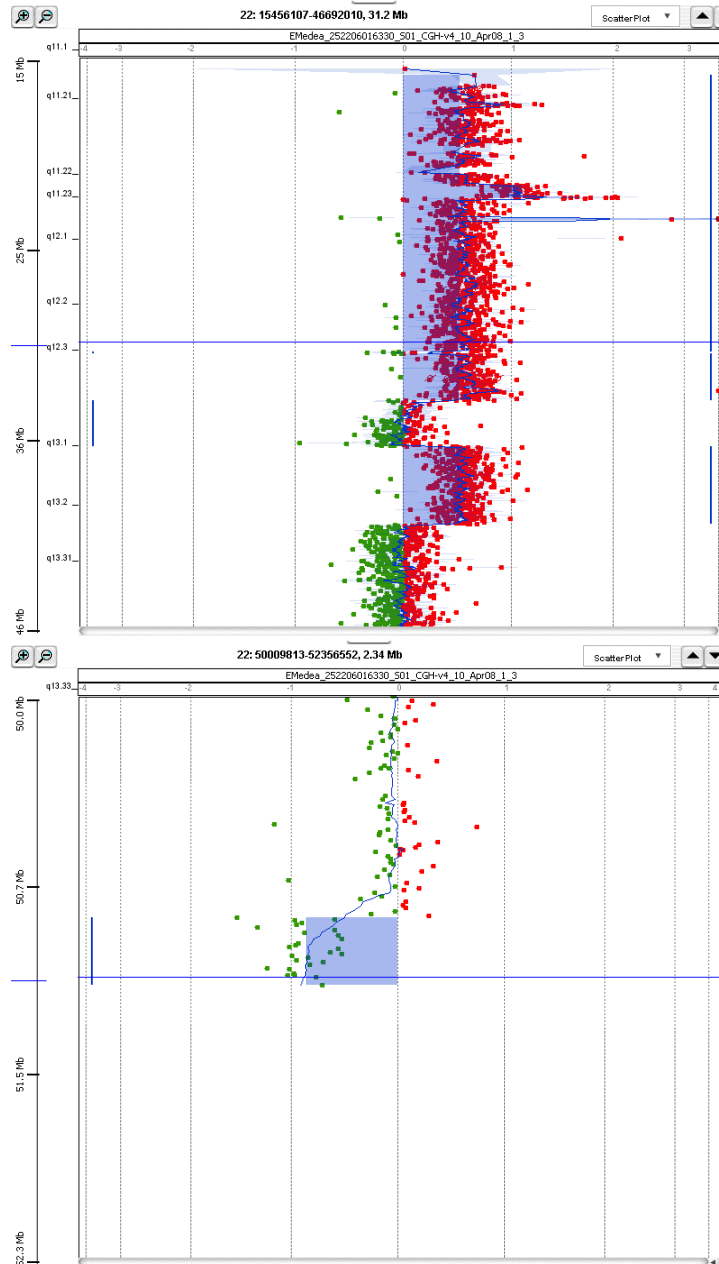

**22q11-12.3 duplication  
size: 18 Mb**

**22q12.3-13.2 duplication  
size: 4.2 Mb**

**22q13.3 deletion  
Size: 240 kb**
