# Supplementary material for: Molecular Mechanisms Generating and Stabilizing Terminal 22q13 Deletions in 44 Subjects with Phelan/McDermid Syndrome
Source: PubMed Central journal article supplement (PMC3136441; doi:10.1371/journal.pgen.1002173), 2011-07-14
Supplement: pgen.1002173.s007.pdf [file pgen.1002173.s007.pdf]

**Table S1.** Clinical features of PMS patients compared to the subjects in this study

| <b>Features</b>                                        | <b>PMS patients*</b> | <b>Our study</b>         |
|--------------------------------------------------------|----------------------|--------------------------|
| Mean age at diagnosis                                  |                      | 11.2 years               |
| Born at term                                           |                      | 85%                      |
| Born pre-term                                          |                      | 15%                      |
| Walking                                                |                      | Mean age 24 months       |
| <b>Neurologic</b>                                      |                      |                          |
| Developmental delay                                    | >95%                 | 100%                     |
| Delayed/absent language                                | >95%                 | 100%                     |
| Neonatal hypotonia                                     | >95%                 | 77% (still present, 41%) |
| <b>Growth</b>                                          |                      |                          |
| Normal                                                 |                      | 69%                      |
| Accelerated                                            |                      | 31% <sup>a</sup>         |
| <b>Seizures</b>                                        |                      |                          |
| Clinical epileptic seizures                            | >25%                 | 30%                      |
| Abnormal EEG epileptic anomalies                       |                      | 27%                      |
| Abnormal EEG with focal or diffused slow abnormalities |                      | 32%                      |
| <b>Facial dysmorphisms</b>                             |                      |                          |
| Long eyelashes                                         | >75%                 | 55%                      |
| Dolichocephaly                                         | >50%                 | 18%                      |
| Full brow                                              | >50%                 | 43%                      |
| Flat midface                                           | >50%                 | 33%                      |
| Ptosis                                                 | >50%                 | 4%                       |
| Large/prominent ears                                   | >50%                 | 65%                      |
| Wide nasal bridge                                      | >50%                 | 50%                      |
| Puffy cheeks                                           | >50%                 | 57%                      |
| Pointed chin                                           | >50%                 | 43%                      |
| Bulbous nose                                           | >50%                 | 59%                      |
| Widely spaced teeth/malocclusion                       | >25%                 | 38%                      |
| Epicanthal folds                                       | >25%                 | 48%                      |
| <b>Extremities</b>                                     |                      |                          |
| Large and fleshy hands                                 | >75%                 | 48%                      |
| Dysplastic toenails                                    | >75%                 | 23%                      |
| 2/3 <sup>rd</sup> toe syndactyly                       | >25%                 | 44%                      |
| 5 <sup>th</sup> finger clinodactyly                    | >25%                 | 15%                      |
| <b>Other features</b>                                  |                      |                          |
| Decreased sensitivity to pain                          | >50%                 | 69%                      |
| Hypohydrosis                                           | >50%                 | 17%                      |
| High tolerance to pain                                 |                      | 69% (9/13)               |
| Brain abnormalities at MRI                             |                      | 69% <sup>b</sup>         |
| Cardiac anomalies                                      | 6% <sup>c</sup>      | 6,9%                     |
| Renal problems                                         | >25% <sup>d</sup>    | 10%                      |
| <b>Behavioural features</b>                            |                      |                          |
| Autism (DMS-IV)                                        |                      | 13%                      |
| Behavioural disturbances                               |                      | 77% <sup>e</sup>         |
