# Supplementary material for: Molecular Mechanisms Generating and Stabilizing Terminal 22q13 Deletions in 44 Subjects with Phelan/McDermid Syndrome
Source: PubMed Central journal article supplement (PMC3136441; doi:10.1371/journal.pgen.1002173), 2011-07-14
Supplement: pgen.1002173.s008.pdf [file pgen.1002173.s008.pdf]

| Subject | Method  | Primer F  | Sequence                   | Primer F2 | Sequence               | Primer F3 | Sequence            | Primer R  | Sequence                             | Primer R2 | Sequence              | Primer R3 |
|---------|---------|-----------|----------------------------|-----------|------------------------|-----------|---------------------|-----------|--------------------------------------|-----------|-----------------------|-----------|
| P01     | ACP-Tel | P1-22-F1  | GACAGTGGCCTCTCAGACAA       | P1-22-F2  | TGATGCTCAGAGGAGTGAAGA  |           |                     | ACP-Tel   | TCACAGAAGTATGCCAAGCGAIIIIIAACCTAACCT | UNI-ACP   | TCACAGAAGTATGCCAAGCGA |           |
| P02     | ACP-Tel | P2-22-F1  | GAGCCGCTGTCTGTCTCT         | P2-22-F2  | CAGGAGGACTTGGCTTGA     |           |                     | ACP-Tel   |                                      | UNI-ACP   |                       |           |
| P03     | ACP-Tel | P3-22-F1  | TTCACAGCGTAATCGCAAATG      | P3-22-F2  | GCAGTAAGGAAAGTAGTAGT   |           |                     | ACP-Tel   |                                      | UNI-ACP   |                       |           |
| P04     | ACP-Tel | P4-22-F1  | TCCTGGAACCTCGACATGTTCA     | P4-22-F2  | CAGAGGTCAGTGTITTAGACAA |           |                     | ACP-Tel   |                                      | UNI-ACP   |                       |           |
| P05     | ACP-Tel | P5-22-F1  | GTGCCAAATGTGTCAATTGTC      | P5-22-F2  | TCCAACAACCTCCGAACAGCA  |           |                     | ACP-Tel   |                                      | UNI-ACP   |                       |           |
| P06     | ACP-Tel | P6-22-F1  | GAGATGGTAGCAGAGTCAAGA      | P6-22-F2  | AACCTTCCATCTGTCCCTGAG  | P6-22-F3  | GGCCTTCGGACGATTATGA | ACP-Tel   |                                      | UNI-ACP   |                       | UNI-ACP   |
| P07     | ACP-Tel | P7-TEL-1F | GCACCATATCATTACGGAAAG      | P7-TEL-2F | AGCCTACAAGAAGTTCATCA   |           |                     | ACP-Tel   |                                      | UNI-ACP   |                       |           |
| P08     | ACP-Tel | P8-22-F1  | GGAGGCTCAGTGCACATTCAA      | P8-22-F2  | GGGAAGTCCTCAGAACTCAG   |           |                     | ACP-Tel   |                                      | UNI-ACP   |                       |           |
| P11     | LR-PCR  | P11-22-F  | AGTGCTTGCCTCACCAAGA        |           |                        |           |                     | P11-12-R  | TCGGCAGCTCCTTCTCATC                  |           |                       |           |
| P12     | ACP-Tel | P12-22-F1 | CGGTGCTGTCCAAGTTCT         | P12-22-F2 | CTGTTCCCTCTTTCCTACACA  |           |                     | ACP-Tel   |                                      | UNI-ACP   |                       |           |
| P13     | ACP-Tel | P13-22-F1 | TCCACAANTCAGGGCACAAGA      | P13-22-F2 | GAACCCACGGGATGTTCTCA   | P13-22-F3 | CAGGTTAGGAGTACTACTC | ACP-Tel   |                                      | UNI-ACP   |                       | UNI-ACP   |
| P14     | ACP-Tel | P14-22-F1 | ACCCAGTCTCTTTGACCAC        | P14-22-F2 | AGTCCAGCTTTTTCTGAAGAC  |           |                     | ACP-Tel   |                                      | UNI-ACP   |                       |           |
| P15/P16 | LR-PCR  | P15-22-F  | CCCTCCAGAGACCAAGA          |           |                        |           |                     | P15-12-R  | GCAGGCCACCTTCTCTAAA                  |           |                       |           |
| P20 BP1 | ACP-Tel | P20-22-1F | CCAGGTGAGTTCCTACAA         | P20-22-2F | TGGCTTGAACAGTCTCTCACT  |           |                     | ACP-Tel   |                                      | UNI-ACP   |                       |           |
| P20 BP2 | ACP-Tel | P20-22-5F | TGTTTACCAAATCCACTCACTGCTT  | P20-22-6F | CAGCAATAGATTCCACTCTTAG |           |                     | ACP-Tel   |                                      | UNI-ACP   |                       |           |
| P20 BP3 | ACP-Tel | P20-22-3F | TGTTTACCAAATCCACTCACTGCTT  | P20-22-4F | CAGCAATAGATTCCACTCTTAG |           |                     | ACP-Tel   |                                      | UNI-ACP   |                       |           |
| P21     | ACP-Tel | P21-22-1F | GTGTCTCCCAATTTCTCATAAC     | P21-22-2F | GTGGTTCTCTTTGGTCTTG    |           |                     | ACP-Tel   |                                      | UNI-ACP   |                       |           |
| P26     | Inv-PCR | P26-22-1F | ATGAGGGCTCTGTCAAGCAT       | P26-22-2F | TGGATGCAAAGTCCAGTTGA   |           |                     | P26-22-1R | GACTGCGGGCATCCTGGAA                  | P26-22-2R | CGTGGAGCCGTCTTTGTAAG  |           |
| P30     | ACP-Tel | P30-22-1F | TCAGCTCCCATCCCAAGTG        | P30-22-2F | GGGATGGCTACTGTGCTCACT  |           |                     | ACP-Tel   |                                      | UNI-ACP   |                       |           |
| P31     | ACP-Tel | P31-22-1F | GTGCTGTTGTGCTCGGATGGT      | P31-22-2F | CTGTGCTCGTGTCTGCTCTT   |           |                     | ACP-Tel   |                                      | UNI-ACP   |                       |           |
| P32     | ACP-Tel | P31-22-1F |                            | P31-22-2F |                        |           |                     | ACP-Tel   |                                      | UNI-ACP   |                       |           |
| P34     | ACP-Tel | P34-22-1F | GTCAGGAGGCAGAACTTCA        | P34-22-2F | AGGGCATTTCAGAACCATTTC  |           |                     | ACP-Tel   |                                      | UNI-ACP   |                       |           |
| P36     | ACP-Tel | P36-22-1F | CTGTTGTGTCTGTTCACTCCT      | P36-22-2F | TGAAGCTGGAGCAGACTATC   |           |                     | ACP-Tel   |                                      | UNI-ACP   |                       |           |
| P37     | LR-PCR  | P37-22-F  | ACCCGGTGAATGAGCAAATG       |           |                        |           |                     | P37-22-R  | GCCCATGAAGAGGCTGTTGA                 |           |                       |           |
| P38     | LR-PCR  | P38-22-F  | AGCCGGAAGTTAAAAACCAA       |           |                        |           |                     | P38-22-R  | AGGCCGTCTTGAACAAGTCT                 |           |                       |           |
| P39     | ACP-Tel | P31-22-1F |                            | P31-22-2F |                        |           |                     | ACP-Tel   |                                      | UNI-ACP   |                       |           |
| P40     | ACP-Tel | P40-22-1F | GCCGTCAGGCCAGTCT           | P40-22-2F | CAGGGCCTGGGAAGATCAG    |           |                     | ACP-Tel   |                                      | UNI-ACP   |                       |           |
| P42     | LR-PCR  | P42-22-F  | TGCCCTCCCAAGCCCAAGCTCAAGTC |           |                        |           |                     | P42-22-R  | ACCTCAGACCCATCCAGTCGATGCC            |           |                       |           |
| P43     | LR-PCR  | P43-22-F  | CTCCACCCAGGCTGTATATTT      |           |                        |           |                     | P42-22-R  |                                      |           |                       |           |
| P44     | LR-PCR  | P44-22-F  | CACCACTGTGGCATTCTCTC       |           |                        |           |                     | P44-22-R  | CTGCTTCTTGCTCTGTCA                   |           |                       |           |
